# Supplementary material
Source: PubMed Central journal article supplement (PMC10359797)
Supplement: ejhpharm-2021-002933supp001.pdf [file ejhpharm-2021-002933supp001.pdf]

## Supplementary material

### Questionnaire used after the first dose of vaccine

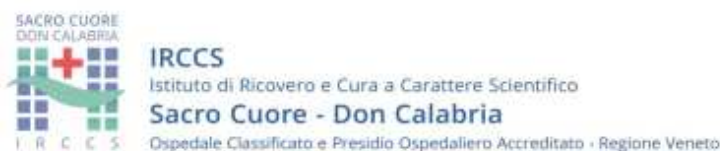

#### IN RIFERIMENTO ALLA PRIMA DOSE DI VACCINO RICEVUTA

1. Iniziali del Nome e del Cognome

\_\_\_\_\_

2. Reparto

\_\_\_\_\_

3. Sei mai risultato positivo per Covid-19?

Sì  No

4. Data primo tampone (rapido o molecolare) positivo:

\_\_\_\_\_

5. Data negativizzazione del tampone:

\_\_\_\_\_

6. Sei stato ospedalizzato per l'infezione da Covid-19?

Sì  No

7. Sei stato vaccinato per Covid 19 con vaccino Comirnaty, BioNTech/Pfizer?

Sì  No

8. Hai avuto, dopo la vaccinazione, una reazione di questo tipo? Seleziona tutte le voci applicabili.

- nessuna;  
 dolore nel sito di iniezione;  
 stanchezza;  
 mal di testa;  
 dolore muscolare;  
 dolore articolare;  
 brividi;  
 eruzioni cutanee  
 febbre  
 tachicardia

Dopo quanto tempo? \_\_\_\_\_

Per quanto tempo? \_\_\_\_\_

Se hai avuto febbre, dopo quanto tempo? \_\_\_\_\_

con che valore? \_\_\_\_\_

per quanto tempo? \_\_\_\_\_

Altro (indica qualsiasi altro sintomo):

\_\_\_\_\_

9. Hai assunto farmaci per contrastare i sintomi? Se sì quali?

\_\_\_\_\_

Data

Firma

## Questionnaire used after the second dose of vaccine

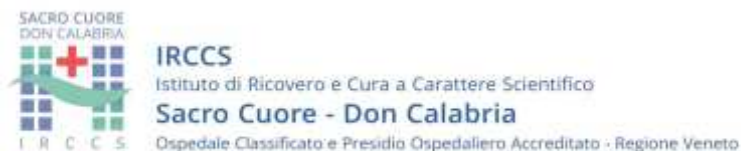

### IN RIFERIMENTO ALLA SECONDA DOSE DI VACCINO RICEVUTA

1. Iniziali del Nome e del Cognome

---

2. Reparto

---

3. Sei mai risultato positivo per Covid-19?

Sì  No

4. Data primo tampone (rapido o molecolare) positivo:

---

5. Data negativizzazione del tampone:

---

6. Sei stato ospedalizzato per l'infezione da Covid-19?

Sì  No

7. Sei stato vaccinato per Covid 19 con vaccino Comirnaty, BioNTech/Pfizer?

Sì  No

8. Hai avuto, dopo la vaccinazione, una reazione di questo tipo? Seleziona tutte le voci applicabili.

- nessuna;  
 dolore nel sito di iniezione;  
 stanchezza;  
 mal di testa;  
 dolore muscolare;  
 dolore articolare;  
 brividi;  
 eruzioni cutanee  
 febbre  
 tachicardia

Dopo quanto tempo? \_\_\_\_\_

Per quanto tempo? \_\_\_\_\_

Se hai avuto febbre, dopo quanto tempo? \_\_\_\_\_

con che valore? \_\_\_\_\_

per quanto tempo? \_\_\_\_\_

Altro (indica qualsiasi altro sintomo):

---

9. Hai assunto farmaci per contrastare i sintomi? Se sì quali?

---

Data

Firma
